# Supplementary material
Source: publisher site journal article supplement (https://www.spandidos-publications.com/5978/downloadSupplementary)
Supplement: Supplementary file 1 [file downloadSupplementary]

## Sheet: Sheet1
Supplementary Table SII. 911 targets of osteosarcoma
TP53
CHEK2
RB1
ATRX
RECQL4
MDM2
CDKN2A
MIR140
FOS
OS9
CDK4
BGLAP
MTAP
SPARC
AKT1
EZR
IDH1
COPS3
PTH1R
RUNX2
GNAS
SQSTM1
FOSB
MIR34A
GATA1
WRN
IGF1R
ERBB2
IDH2
MYC
FOXC2-AS1
SLC19A1
WRAP53
HIF1A
CDKN1A
MYCN
MMP2
RPS19
RPL11
RPL5
TNFSF11
SATB2
MMP9
MALAT1
RPS10
RPS20
RPS24
IL6
BAX
ABCB1
IGF1
RPS15A
PTH
ESR1
SPP1
EXT2
BMP2
CASP3
RPS29
RPS7
ERCC2
IGF2
CD99
E2F1
TUG1
PTHLH
VDR
JUN
RPL15
RPL18
RPL35
RPL35A
RPL27
RPS26
RPL26
RPS17
RPL31
RPS27
RPS28
TSR2
ADA2
TNF
VEGFA
CTNNB1
WT1
DIPK1A
RPS10-NUDT3
ERVFRD-3
TNFSF10
EXT1
TNFRSF11B
IBSP
DHFR
CYCS
MEG3
LMNA
BCL2
SOX4
PTEN
SNRNP25
IGFBP5
SP7
HOTAIR
EWSR1
PVT1
FRZB
EGFR
EGF
XRN1
ABCC1
H19
CCND1
CDH11
DANCR
MAPK14
PRIM1
TUSC7
TGFB1
NKIRAS1
IQCG
DBA2
UCA1
SOX2-OT
HULC
NEAT1
ANXA5
TSPAN31
ALPP
XIST
MIR133A1
CSF3
SNHG12
MIR95
ZEB1-AS1
DCN
KCNMB4
RBL1
STAT3
CASC2
GAS5
SATB2-AS1
CD274
MIR210
RBL2
EWSAT1
BCAR4
CDKN2B-AS1
ZNF687
ENO2
H3-3B
PMP22
CREB3L1
SNHG1
CXCR4
SERPINA3
CCAT1
NNT-AS1
LOC730101
HIF1A-AS2
FAM180A
LINC00161
IGFBP6
TSC2
BMP1
LSAMP
PARP1
H3-3A
MIR21
CD34
PACERR
CCAT2
NELL1
CD36
FENDRR
MIR210HG
HOTTIP
LUCAT1
H2AC18
IL11
RAPH1
IGFBP3
ANAPC1
HNF1A-AS1
FBN1
PANDAR
LINC00901
HMGB1
HOXA11-AS
PGR
CCNB3
TNFRSF11A
BANCR
E2F4
CT70
RECQL5
PCNA
MELTF
NOTCH1
CCNG1
TNFRSF10D
KMT2E-AS1
MYHAS
TMIGD3
RAD51
MIR181C
MAPK1
MAPK7
PLXDC1
EBF2
LNCRNA-ATB
CDK1
PCAT1
PDB4
PTGS2
MIR34AHG
FAU
EGFR-AS1
E2F5
MTOR
CHEK1
PDCD1
SYP
USP6
PARTICL
BBS9
RECK
FAS
CASP8
BMP6
MIR139
CDK6
MIR199A1
CAV1
MET
CCNA2
CCNE1
FRS2
CALCA
MME
LGALS1
MIR188
ROCK1
CDKN1B
MIR539
RBIS
MIR548J
C4B-AS1
ATP8A1
VGLL3
SMAD4
APAF1
MYOG
SKP2
C1orf116
TERT
BRCA1
CTDSP2
MIR214
TWIST1
KRAS
EMILIN1
EZH2
MIR542
COL1A1
MIR34C
MIR143
MIR503
CDH1
NKX3-2
BMI1
S100A4
CDK2
YAP1
SP1
CDKN2B
SERPINF1
EXO1
MIR335
GRM4
ALPL
MIR142
VEGFC
TYMS
HELLS
SOST
WWOX
XPC
MIR155
VCP
PIM1
MIR17
MIR129-1
MALINC1
MMP13
APEX1
MSH6
GSTP1
HSPA4
SERPINE1
FGF2
HRAS
MIR9-1
BRCA2
CCN1
BIRC5
ERCC3
CDKN1C
MGMT
CD44
PPARG
MATN4
ATM
MIR145
BLM
GSK3B
EP300
E2F3
GADD45A
MIR150
MAPK8
MIR221
KDM4C
CXCL8
CCNB1
PPM1D
PIK3CA
IL11RA
IFNG
DUX4
DUX4L8
DUX4L1
DUX4L7
MIR6859-1
E2F2
ERCC1
NOB1
IL1B
ID2
ZEB1
KHDRBS3
MIR125A
CCND3
SOX9
MSH2
MIR129-2
HDAC1
CCL2
HSP90AA1
BCL6
ACAN
MIR29B1
CCN2
RAF1
WNT5A
PRDM2
RLN2
CD68
ITGAV
MIR193A
MTG2
SIRT1
MIR494
MIR491
PTK2
TRAF6
PDGFB
DDB2
CXCL12
MIR149
ITGB1
AKAP12
TGFBR1
H19-ICR
PRL
PATZ1
DKK1
GLI2
ESR2
MMP14
PLAU
PECAM1
TP73
TRIM14
ADCY10
CCND2
MIR206
MIR22
PTCH1
ETV6
L2HGDH
SRC
PRKDC
PSMD10
MTDH
PHLDA2
RMI2
ZNF395
RPL7A
ZNRF3
MIR338
DNMT1
NR3C1
MKI67
MIR217
RELA
VTN
BCL2L1
SOX2
STK11
KRT7
CA8
MIR15B
FEN1
BRIP1
RECQL
MTHFR
IL1A
NFATC2
FLII
LCOR
TMEM33
DYNC1LI2
MIR9-3HG
MIR183
MDM4
JAK2
MIR451A
MIR16-1
TIMP2
TIMP1
MIR27A
KITLG
MIR320A
LINC01194
PMS2
CEBPB
MCL1
TOP3A
RMI1
ROR2
MIR195
RPA1
RPS16
MIR29A
MIR483
AURKB
ATAD2
BMP4
THBS1
IL1RN
FASLG
MIR34B
HAS2
RAD52
MMP3
SNHG16
RPS3
KDR
CLUAP1
MIR181B1
MIR196A1
SIX1
VIM
CTLA4
HK2
IGFBP4
TP63
BECN1
ITGA2
KRT5
KRT8
CD79A
DLX5
CD2
CALD1
RPN1
DLG2
OSGEP
KRT20
TRIM37
CD5
SPTLC3
KIFC3
NFE2L3
MPP2
SPN
RNF130
RGL2
ZNF133
NPNT
S100A16
CCDC80
FSCB
CRYZL1
SSX1
UHRF1BP1
ZSCAN26
ZNF321P
HCG18
MIR656
MIR4786
ERBB4
CDH2
CTTN
CSF1
TGFB2
HMGN5
IL3
AR
IKBKB
P2RX7
RPS11
XIAP
SMAD2
IGF2BP3
EFNA4
CDC25A
LRP5
MTA1
TFRC
MIR26A1
SLC2A1
NFKBIA
HMGA2
SMARCB1
PLAUR
MIR223
NF2
MIR144
GSTM1
MIR29B2
ERCC5
DNA2
SLC20A2
KIF2A
RARA
UHRF1
CYP19A1
MRE11
FGF1
KEAP1
MMP1
ACKR3
EDN1
KIT
MIR375
MICA
S100A6
FASN
CNR1
PHB1
MIR101-1
GH1
GSTT1
TRPV1
FLI1
CDKN2C
RBBP7
MRC2
CDK11B
ATF2
CREBBP
ADORA3
MIR506
BDKRB1
IGF2R
MYOD1
BAMBI
RPL4
MIR198
FN1
MAPK3
SNAI1
ACP5
FOXM1
NFKB1
MIR25
EPOR
PIK3CG
BIRC7
MIR30A
TOP2A
HDAC4
LOX
NPM1
PENK
KDM5B
MIR133B
PLK1
KLF4
DLEU1
ERCC4
PROM1
OS4
GLI1
WIF1
MIR200C
FGFR3
CDC20
MIR194-1
DES
HAVCR2
MIR19A
COL3A1
MIR1-1
STMN1
COL18A1
ADM
MIR132
ADAMTS17
CMTM8
MIR203A
ARID4A
MCM7
NCL
RPLP2
EPAS1
KCNH1
TIMP3
RASSF1
KLRK1
MIR15A
STAT1
DHX9
CCDC26
IL10
MIR455
MUS81
CASP9
SNAI2
HES1
RAD51D
MIR342
ALDOA
PDGFRB
NES
HSPA5
TGFA
MIR212
YBX1
GDI2
ADAMTS6
TASOR2
ECT2
MIR141
CTSB
MIR497
IMPDH2
SMAD1
LOC110013312
DKC1
RPL21
TINF2
TERC
BDNF-AS
MIR492
MIR498
KISS1
MAP3K5
PRKAA1
IFI16
IFNA1
MIR124-1
NOTCH2
MIR29C
LUC7L2
ROCK2
WNT1
RAB22A
MIR10B
FGFR1
CCN3
ESRRA
NME1
CDK14
MIR152
RHOA
LTA
MLH1
OSM
BMP7
SND1
MIR184
MIR20A
MIR16-2
SLPI
CRAT
MIR126
POSTN
PDPN
TXNRD2
MAD2L1
GHR
MIR93
MIR100
MIR429
AGPAT2
CASR
GSTM3
CCL5
FOXO1
AIFM1
MIR148A
LIF
TAGLN
CEBPA
HSP90B1
CUL4B
KNG1
ING1
MIR340
NRP2
KLF6
BHLHE41
MIR181A1
MIR101-2
MIR138-1
MIR106A
PTTG1
FBXW7
XRCC6
CFLAR
FBL
RPS8
MIR137
MIR194-2
DICER1-AS1
MIR211
BARD1
RAD51C
MIR122
GDF2
TET2
ERCC6
FAM111B
PIF1
USB1
CYC1
PRKCG
MIR138-2
MIR664A
ABCC3
CCR5
CASP7
KCNMA1
RB1CC1
MTR
SHMT1
NACA
ELK1
TNFRSF10B
MIR33B
B2M
EPHA2
FOLR1
ZEB2
PKM
MIR485
YY1
PRKAR1A
MEN1
PHLDB1
HGF
CASP1
MIR199B
MIR224
MIR384
GNL3
IL6R
MUC1
MIF
MIR199A2
MIR421
CBX4
BMP3
TNC
IL2
SOX5
MIR377
NDRG1
LINC00628
PTPRC
PHEX
XRCC3
MIR204
MIR26B
NRP1
SDC2
LPAR1
ITGA3
CNMD
TKT
MNAT1
JAG1
LDHA
IDO1
MIR326
MIR202
MIR410
FGFR2
MIR301A
MIR449A
HSPD1
CDK9
ITGB3
TGM2
PLOD1
METTL3
MIR185
MIR134
FOXD2-AS1
MIR363
NORAD
MCM10
MIR107
FAP
NAMPT
XPA
TNFRSF10A
MGP
MIR24-1
MIR381
ABCG2
SIRT6
CYP3A4
IFNB1
MIR330
MIR671
MIR422A
PLAAT3
MMP11
XRCC5
DDX11
FGF7
EID1
MIR96
ABL1
SMARCA4
PAX3
MAP2K1
XPO1
COPS5
FER1L4
MIR130A
CRNDE
MIR216A
MIR300
EIF2AK2
BIRC3
LEP
PDGFA
TRIM21
MIR4458
MYB
DEK
ATF4
HSPG2
CBX3
CCNC
NR1I2
PTGS1
MIR31
ITGA6
CRYAB
LUM
WWTR1
KLF8
MIR874
MIR1301
DDX5
AURKA
PLCB1
LPAR3
CHUK
VCAN
NF1
SHH
MUTYH
PALB2
SUFU
PMAIP1
TCHP
MIR605
LFS3
SMARCA2
CSF2
SOX18
COL2A1
NOG
SST
MAP2K4
EIF4E
TXN2
GDF10
CREB1
CYP27B1
CTBP1
RBPJ
MIR1908
EPO
PPARGC1A
TRIAP1
P53
LFS1
BCC7
BMFS5
RAD53
CHK2
CDS1
LFS2
CD28
